# Supplementary material for: Zeolitic imidazolite framework derived bifunctional N,P-codoped hollow carbon sphere electrocatalysts decorated with Co2P/Fe for rechargeable Zn–air batteries
Source: Royal Society of Chemistry journal article supplement (doi:10.1039/d4qi01152j), 2024-01-01
Supplement: d4qi01152j1.pdf [file d4qi01152j1.pdf]

# **Zeolitic Imidazolate Framework Derived Bifunctional N, P-codoped Hollow Carbon Sphere Electrocatalysts Decorated with Co<sub>2</sub>P/Fe for Rechargeable Zn-air Batteries**

Songlin Zhao<sup>a</sup>, Maolin Liu<sup>a</sup>, Chengcai Wang<sup>a</sup>, Luhang Cai<sup>a</sup>, Wei Sun<sup>b,\*</sup>, and

Zhihong Zhu<sup>a,\*</sup>

<sup>a</sup>Institute of Nano-science and Nano-technology, College of Physical Science and Technology, Central China Normal University, Wuhan 430079, P.R. China.

<sup>b</sup>Key Laboratory of Laser Technology and Optoelectronic Functional Materials of Hainan Province, College of Chemistry and Chemical Engineering, Hainan Normal University, Haikou 571158, PR China

\*Corresponding author

Email: zhzhzhu@mail.ccnu.edu.cn (Z. Zhu), sunwei@hainnu.edu.cn (W. Sun)

## **1. Experimental Section**

### **1.1. Characterizations**

The morphology of the materials was received by applying scanning electron microscopy (SEM, JEOL JSM-7900F). Internal structure and corresponding element mapping were obtained by using transmission electron microscope (TEM, Talos F200x). The crystalline phase of various materials was collected by an X-ray diffractometer (XRD, PANalytical X'Pert PRO). The Raman spectrum was recorded on a Raman Spectrometer (HORIBA France SAS). The X-ray photoelectron spectroscopy (XPS) was carried out on an ESCALAB 250Xi spectrometer. The N<sub>2</sub>

adsorption/desorption isotherms were acquired by BET measurement on a JW-BK200C.

## 1.2. Electrochemical Test

Electrochemical tests were measured on a CHI760e electrochemical workstation with a standard three-electrode system for ORR and OER experiments. Pt plate was used as the counter electrode and the reference electrode was the Ag/AgCl electrode with saturated 3 M KCl solutions. The inner diameter of 5.0 mm of the rotating disk electrode or the diameter of 5.61 mm rotating ring-disk electrode served as the working electrode to load the catalysts. The Co<sub>2</sub>P/Fe/NP-HCSs suspension was obtained by dispersing 5 mg catalyst in 980  $\mu$ L aqueous isopropanol (700  $\mu$ L deionized and 280  $\mu$ L isopropanol), followed by adding 20  $\mu$ L 5 wt% Nafion solution and ultrasonic treatment for 3 h to obtain a uniform suspension ink. Then, 10  $\mu$ L homogeneous sample ink was drop-cast onto a glossy working electrode and further dried at 48 °C before measurements. The catalyst activities were evaluated by the linear sweep voltammetry (LSV) method with a scan speed of 5 mV s<sup>-1</sup> at RDE. The durability performance of catalysts was examined by i-t chronoamperometry at a proper potential. Electrochemical impedance test was carried out under 1.57 V vs. RHE in 0.1 M KOH.

To further explore the reaction mechanism of ORR, Electron transfer number, and HO<sub>2</sub><sup>-</sup> yield was received by RRDE tests. The calculation formula was as follows:

$$n = \frac{4I_d}{I_d + I_r/N} \quad (1)$$

$$\text{H}_2\text{O}_2(\%) = \frac{200I_r/N}{I_d + I_r/N} \quad (2)$$

where  $I_d$  and  $I_r$  represent the disk electrode current and the ring electrode current, respectively, and the value of N is 0.37 which is the Pt ring collection efficiency.

### 1.3. Zn–Air Battery Test

First, 20 mg Co<sub>2</sub>P/Fe/NP–HCSs was uniformly dispersed in 2 ml ethanol, 60 μL Nafion solution, and 20 μL polytetrafluoroethylene (PTFE) emulsion, sonicated for 6 h to receive a homogeneous ink. The PTFE and active carbon were stirred into a doughlike paste in the volume ratio of 7:3 by adding a fitting amount of ethanol. Then the paste was uniformly coated on a nickel foam and the ink further was sprayed on the above nickel foam, which finally dried at 50 °C for 3 h to obtain the eventual air electrode. The as-prepared catalyst load based on the practical substrate mass was 1 mg cm<sup>-2</sup>. For comparison, the commercial Pt/C and RuO<sub>2</sub> mixture with a loading of 1 mg cm<sup>-2</sup> was applied to prepare the corresponding air electrode. The mixed solution containing 6 M KOH solution and 0.2 M Zn(AC)<sub>2</sub> aqueous solution was used as the alkaline electrolyte. A polished Zn foil was applied as the anode. The further flexible ZABs were prepared as follow: 2.0 g PVA and 1.0 g KOH powder mixture was dissolved in 20.0 ml deionized water and stirring 3 h at 90 °C. Subsequently, yellow PVA/KOH hydrogel was transferred to a laboratory plastic ware and put in the fridge for freezing to obtain a PVA membrane. Finally, the above-prepared catalyst electrode and polished Zinc foil were pressed with a thin PVA membrane to assemble flexible ZABs. All the battery tests were based on a CHI760e workstation.

## 2. Supplementary Figures and Table

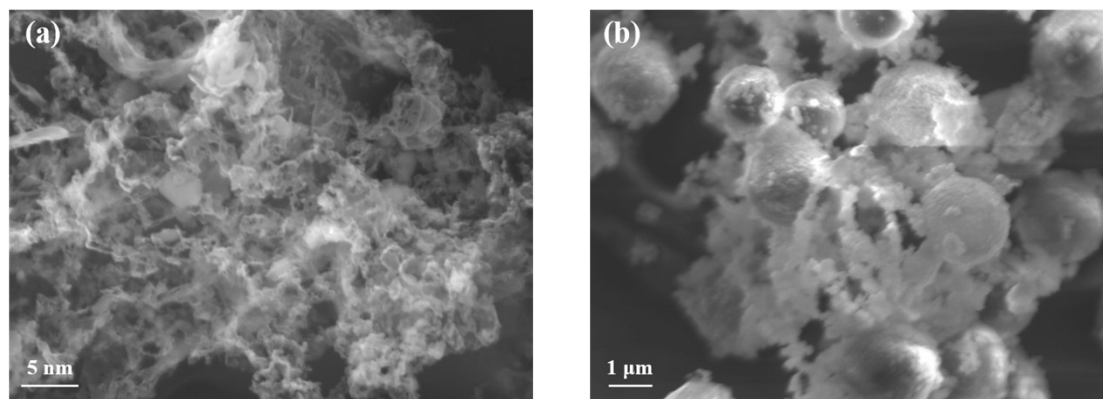

**Fig. S1.** (a-b) SEM images of ferrocene and PS@ZnCo-ZIF/PA/ferrocene.

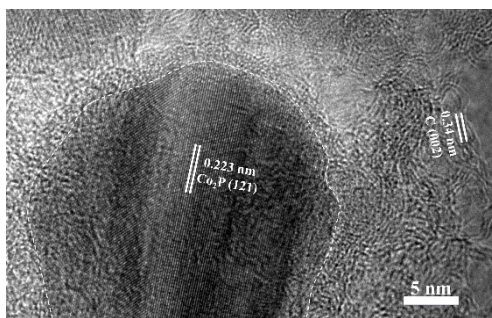

**Fig. S2.** TEM image of Co<sub>2</sub>P/Fe/NP-HCSs.

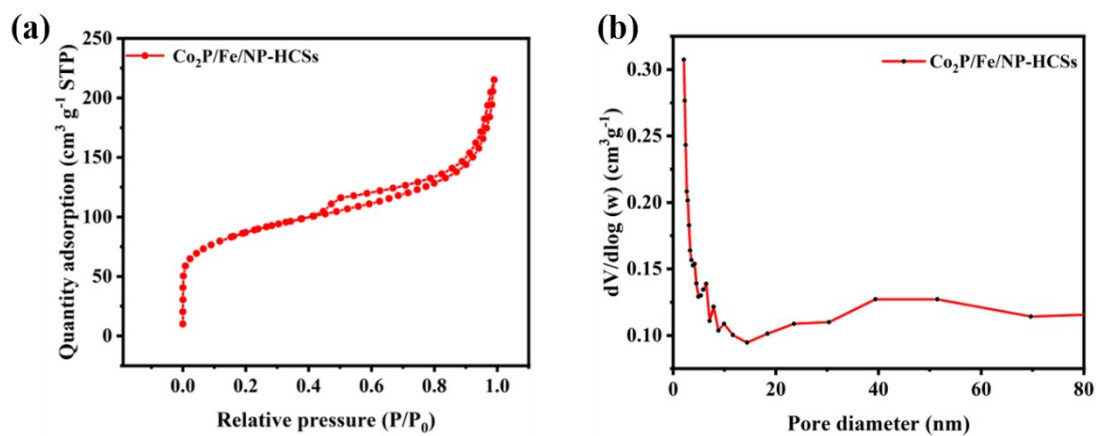

**Fig. S3.** (a) N<sub>2</sub> adsorption-desorption isotherm and (b) the corresponding pore size distribution of Co<sub>2</sub>P/Fe/NP-HCSs.

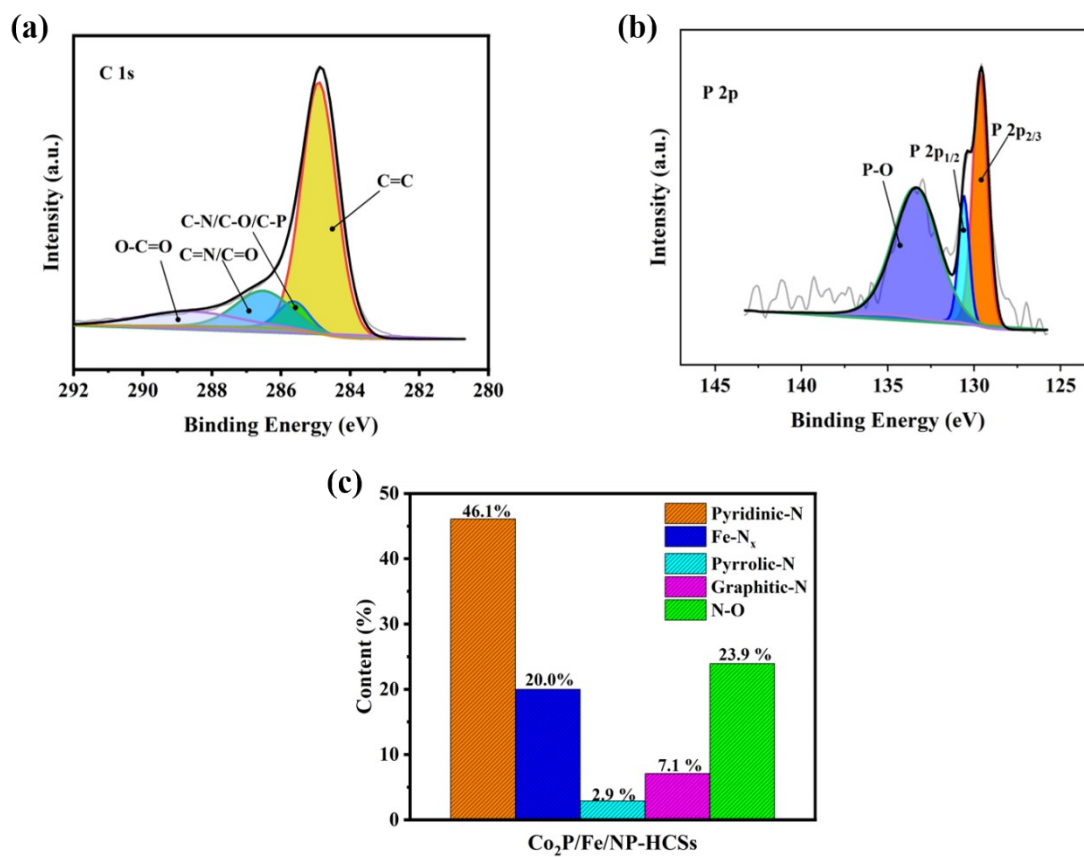

**Fig. S4.** High-resolution XPS spectra of (a) C 1s and (b) P 2p for Co<sub>2</sub>P/Fe/NP-HCSs.

(c) Proportion of various nitrogen types in Co<sub>2</sub>P/Fe/NP-HCSs.

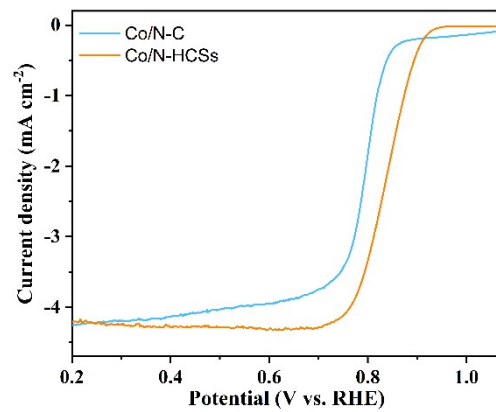

**Fig. S5.** LSV curves of Co/N-C and Co<sub>2</sub>P/Fe/NP-HCSs for ORR.



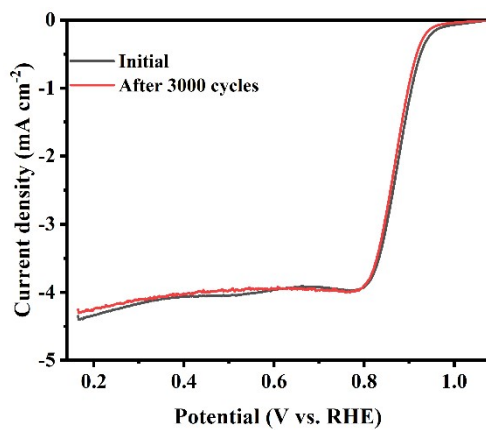

**Fig. S6.** LSV curves of Co<sub>2</sub>P/Fe/NP-HCSs before and after 3000 cycles.

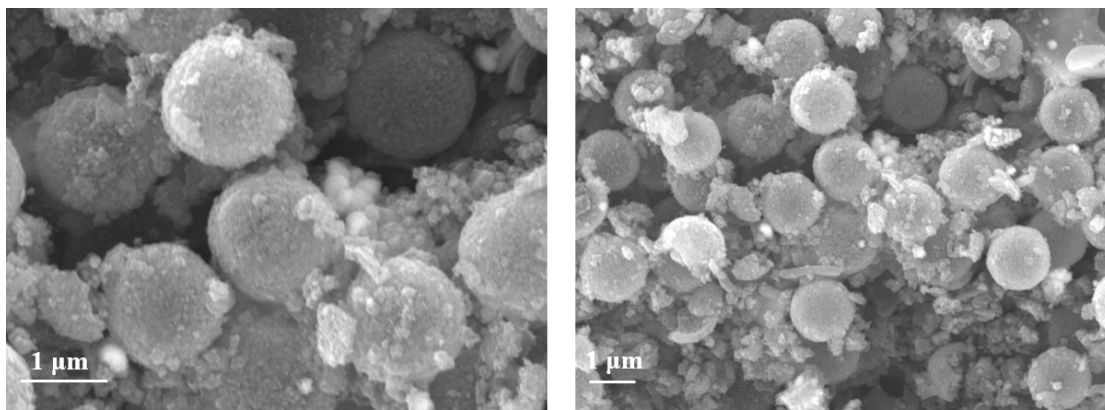

**Fig. S7.** SEM images of Co<sub>2</sub>P/Fe/NP-HCSs after 3000 cycles in 0.1 M KOH.

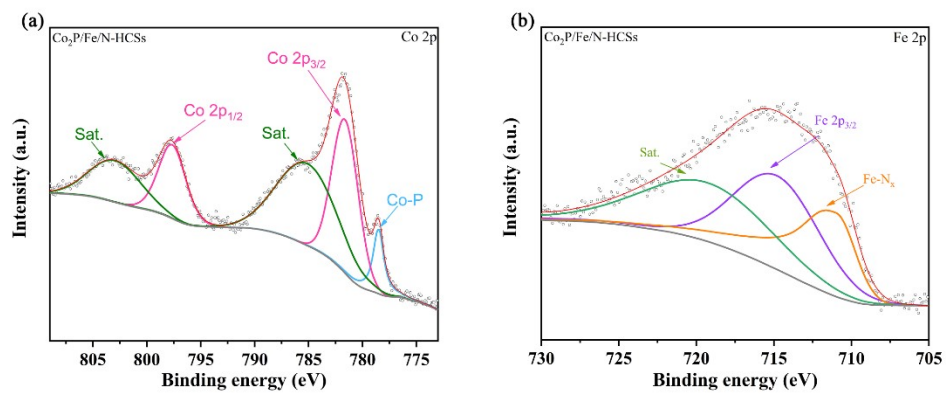

**Fig. S8.** XPS spectra after the ORR test.

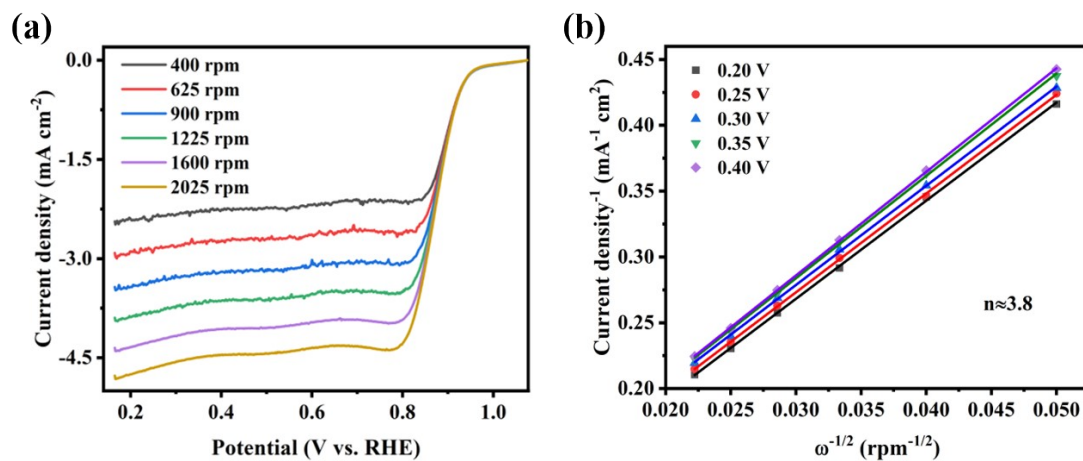

**Fig. S9.** (a) LSV curves in increasing rotating rates and (b) corresponding K-L plots of Co<sub>2</sub>P/Fe/NP-HCSs.

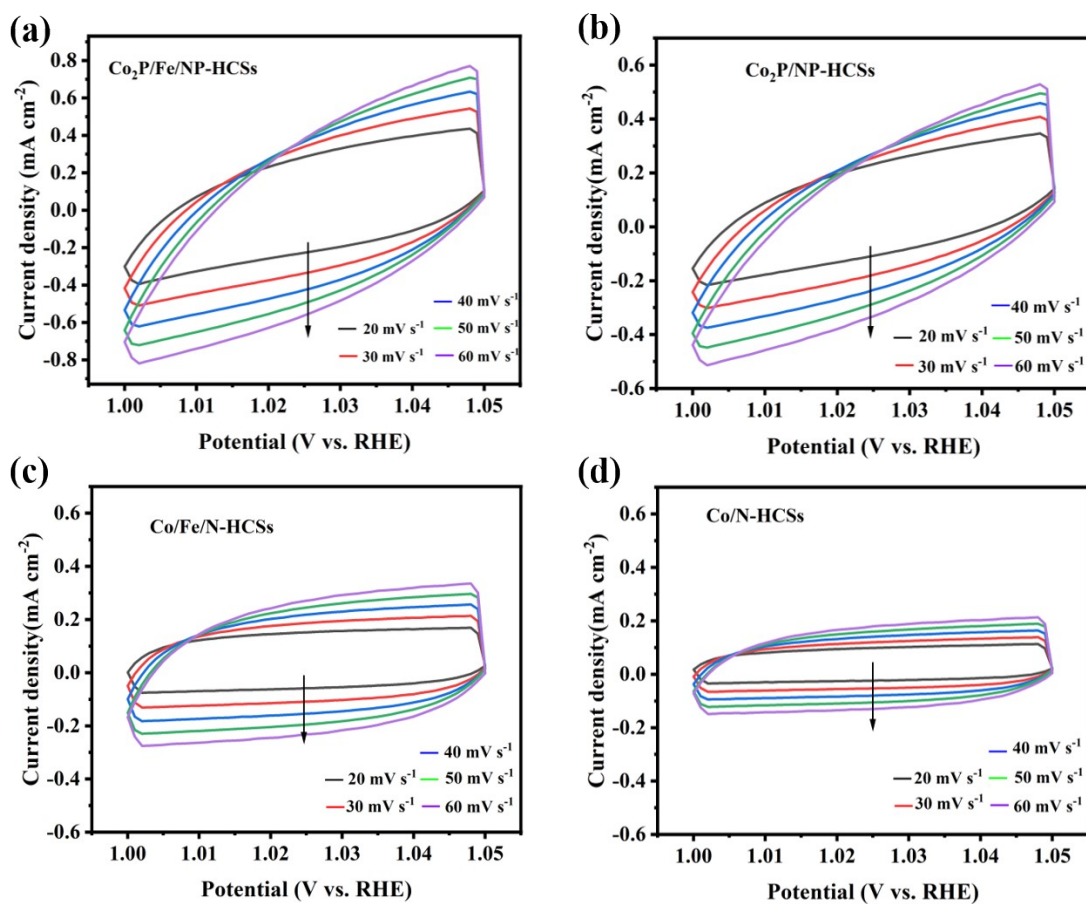

**Fig. S10.** CV curves of (a)  $\text{Co}_2\text{P}/\text{Fe}/\text{NP-HCSs}$ , (b)  $\text{Co}_2\text{P}/\text{NP-HCSs}$ , (c)  $\text{Co}/\text{Fe}/\text{N-HCSs}$ , and (d)  $\text{Co}/\text{N-HCSs}$  at various scan rates in the non-Faradaic region.

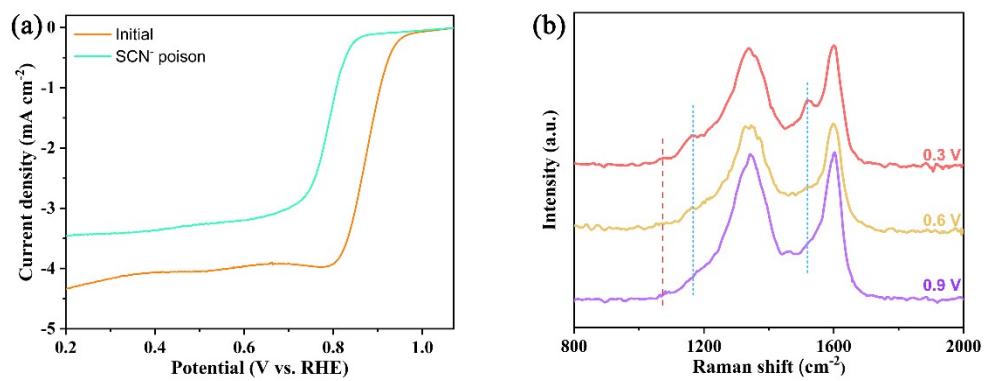

**Fig. S11.** (a) LSV curves of Co<sub>2</sub>P/Fe/NP-HCSs before and after SCN<sup>-</sup> poison. (b)

*In situ* Raman spectra of Co<sub>2</sub>P/Fe/NP-HCSs during the ORR.

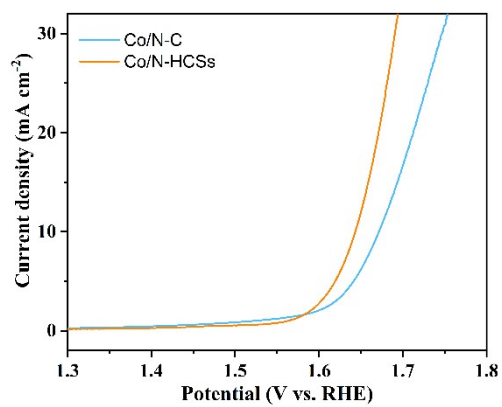

**Fig. S12.** LSV curves of Co/N-C and Co<sub>2</sub>P/Fe/NP-HCSs for OER.

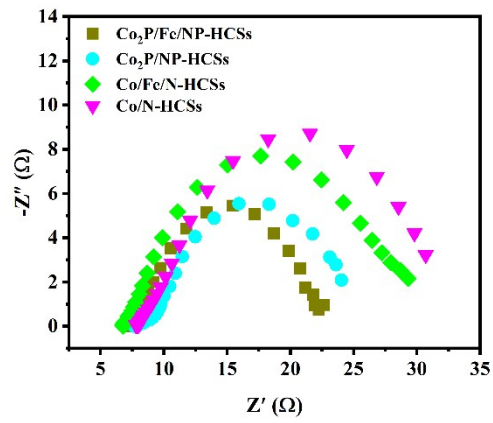

**Fig. S13.** Nyquist plots of the impedance for different catalysts.



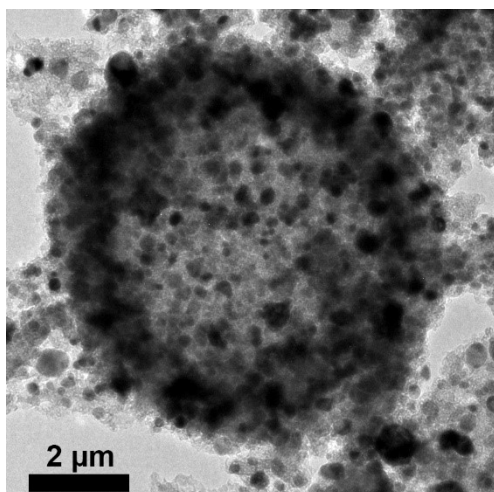

**Fig. S14.** TEM image of  $\text{Co}_2\text{P}/\text{Fe}/\text{NP-HCSs}$  after OER test.

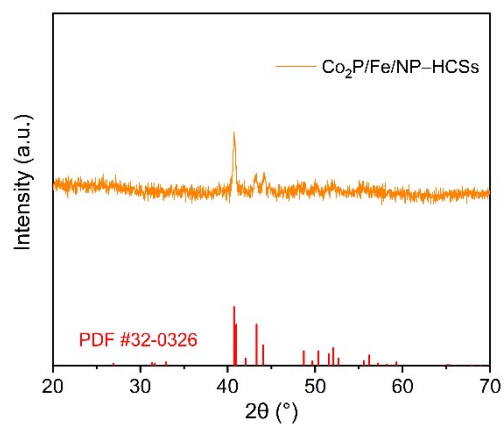

**Fig. S15.** XRD pattern of Co<sub>2</sub>P/Fe/NP-HCSs after OER test.

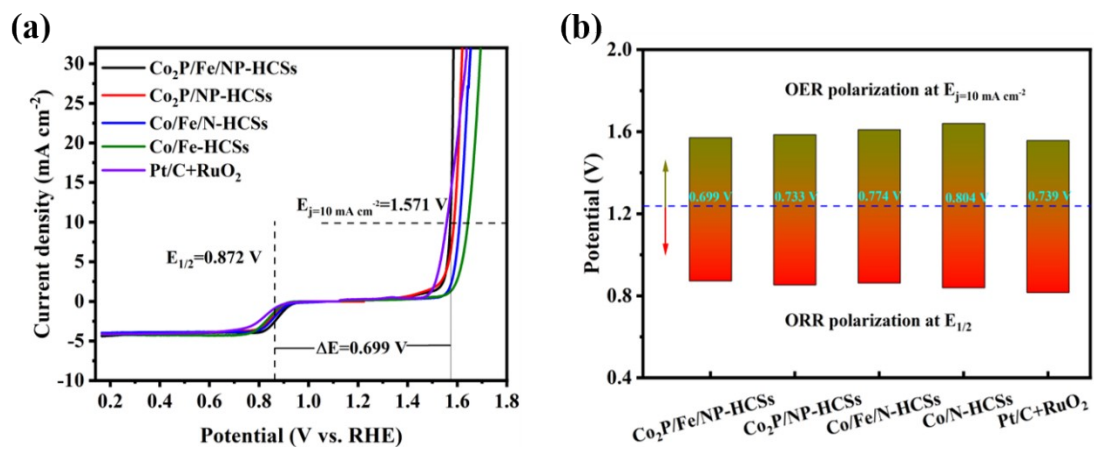

**Fig. S16.** (a) Bifunctional polarization curves for as-synthesized electrocatalysts in ORR/OER potential range. (b) Diagram to compare the  $\Delta E$  value of different catalysts.

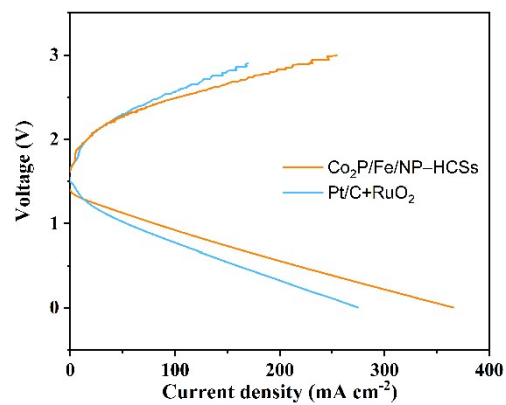

**Fig. S17.** Charge and discharge curves of the ZAB assembled with Co<sub>2</sub>P/Fe/NP-HCSs and Pt/C+RuO<sub>2</sub>.

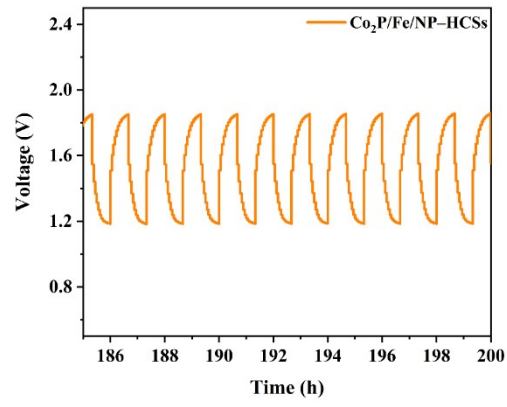

**Fig. S18.** Charge and discharge polarization curves of ZABs with Co<sub>2</sub>P/Fe/NP-HCSs as the air electrode.

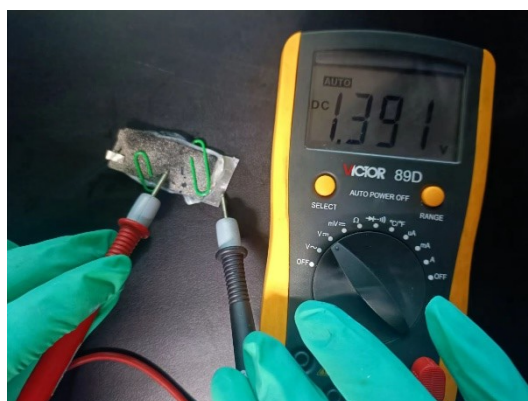

**Fig. S19.** Open circuit voltage of solid-state ZAB tested by a universal meter.

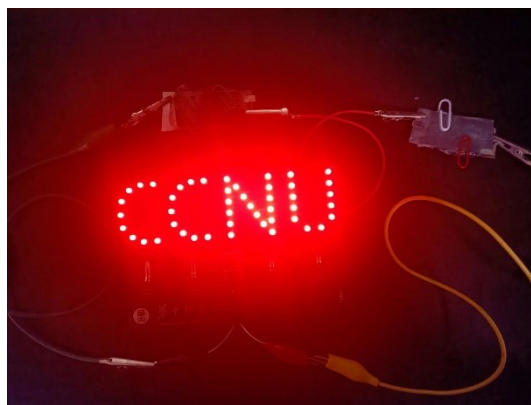

**Fig. S20.** Photograph of two solid-state ZABs interconnected in series for lighting CCNU bulb.

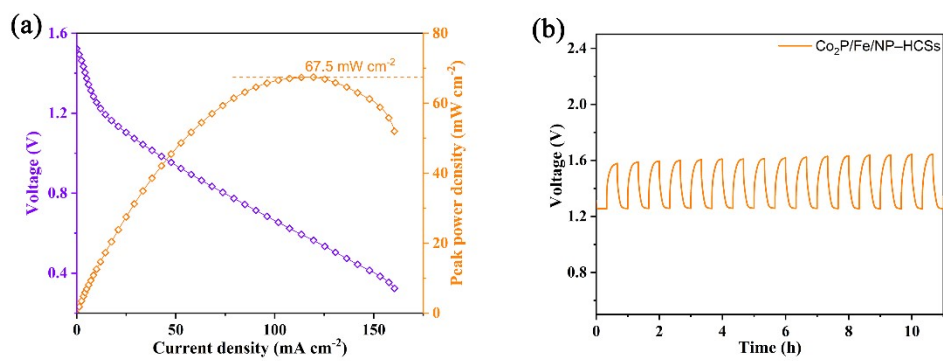

**Fig. S21.** (a) Discharge polarization curve and peak power density and (b) Charge/discharge cycle of  $\text{Co}_2\text{P}/\text{Fe}/\text{NP-HCSs}$ -based ZAB at  $-40\text{ }^\circ\text{C}$ .



**Table S1.** Comparison of the ORR performance of the Co<sub>2</sub>P/Fe/NP–HCSs with other TMPs-based electrocatalysts recently reported.

| Catalysts                                 | E <sub>1/2</sub> | E <sub>j=10</sub> | ΔE           | Reference        |
|-------------------------------------------|------------------|-------------------|--------------|------------------|
| <b>Co<sub>2</sub>P/Fe/NP-HCSs</b>         | <b>0.872</b>     | <b>1.571</b>      | <b>0.699</b> | <b>This work</b> |
| FeCo/Co <sub>2</sub> P@NPCF               | 0.790            | 1.560             | 0.770        | [1]              |
| <b>Co<sub>2</sub>P/doped-CNTs-800</b>     | 0.843            | 1.603             | 0.760        | [2]              |
| <b>Co<sub>2</sub>P@CNF</b>                | 0.800            | 1.690             | 0.890        | [3]              |
| <b>CoNiP/PNC</b>                          | 0.840            | 1.700             | 0.860        | [4]              |
| <b>CoP/NC-800</b>                         | 0.780            | 1.520             | 0.740        | [5]              |
| <b>Co<sub>2</sub>P/CoP@NPC</b>            | 0.770            | 1.550             | 0.780        | [6]              |
| <b>Co<sub>2</sub>P@CoNPG-900</b>          | 0.810            | 1.730             | 0.920        | [7]              |
| <b>Ni,Fe-DSAs/NCs</b>                     | 0.895            | 1.612             | 0.717        | [8]              |
| <b>Co<sub>4</sub>N@d-NCNWs/D</b>          | 0.83             | 1.57              | 0.74         | [9]              |
| <b>P-NCO/NCN-CF@CC</b>                    | 0.828            | 1.588             | 0.76         | [10]             |
| <b>FeN<sub>4</sub>-SC-NiN<sub>4</sub></b> | 0.844            | 1.476             | 0.632        | [11]             |

## Reference

- [1] Q. Shi, Q. Liu, Y. Ma, Z. Fang, Z. Liang, G. Shao, B. Tang, W. Yang, L. Qin, X. Fang, *Adv. Energy Mater.* 10 (2020) 1903854.
- [2] L. Song, H. Fan, X. Fan, H. Gong, T. Wang, J. He, *Chem. Eng. J.* 435 (2022) 134612.
- [3] J. Gao, J. Wang, L. Zhou, X. Cai, D. Zhan, M. Hou, L. Lai, *ACS Appl. Mater. Interfaces* 11(10) (2019) 10364-10372.
- [4] W. Sun, Y. Xu, P. Yin, Z. Yang, *Appl. Surf. Sci.* 554 (2021) 149670.
- [5] L. Feng, R. Ding, Y. Chen, J. Wang, L. Xu, *J. Power Sources* 452 (2020) 227837.
- [6] Q. Shi, Q. Liu, Y. Zheng, Y. Dong, L. Wang, H. Liu, W. Yang, *Energy Environ. Mater.* 5(2) (2022) 515-523.
- [7] H. Jiang, C. Li, H. Shen, Y. Liu, W. Li, J. Li, *Electrochim. Acta* 231 (2017) 344-353.
- [8] Z Wang, X Jin, R Xu, Z Yang, S Ma, T Yan, C Zhu, J Fang, Y Liu, S-J Hwang, Z Pan, HJ Fan, *ACS Nano* 17 (2023) 8622.
- [9] C Zhang, N Huang, Z Zhai, L Liu, B Chen, B Yang, X Jiang, N Yang, *Adv. Energy Mater.* 13 (2023) 2301749.
- [10] Y Liu, Z Jiang, Z-J Jiang, *Adv. Funct. Mater.* 33 (2023) 2302883.
- [11] K Su, S Yang, A Yang, Y Guo, B Liu, J Zhu, Y Tang, X Qiu, *Appl. Catal. B- Environ.* 331 (2023) 122694.
